# Supplementary material for: Invasion-related circular RNA circFNDC3B inhibits bladder cancer progression through the miR-1178-3p/G3BP2/SRC/FAK axis
Source: Springer Nature journal article supplement (doi:10.1186/s12943-018-0908-8), 2018-11-20
Supplement: MOESM1 [file 16284040]

**Additional file 1: Table S1.** The sequences of primers, oligonucleotides and probes used in this study

| <b>Primers</b>    |                         |
|-------------------|-------------------------|
| circFNDC3B-F      | CAAGAAGCAGCCCAAAGTCG    |
| circFNDC3B-R      | CATGGCTGAGGGGTAGCTTG    |
| linear FNDC3B-F   | ACTGAAAGACCGCCAGATCG    |
| linear FNDC3B-R   | TCTTGCTCGTCGCTCTGTTT    |
| GAPDH-F           | GGAGCGAGATCCCTCCAAAAT   |
| GAPDH-R           | GGCTGTTGTCATACTTCTCATGG |
| divergent GAPDH-F | GAAGGTGAAGGTGCGAGTC     |
| divergent GAPDH-R | GAAGATGGTGATGGGATTTTC   |
| CD82-F            | CTGTTCTCGCGAAGTCAAGG    |
| CD82-R            | AGGATGATGCCCAGGTTCTC    |
| P21-F             | TGCCCAAGCTCTACCTTCC     |
| P21-R             | CAGGTCCACATGGTCTTCCT    |
| NFKBIA-F          | GTTGAAGTGTGGGGCTGATG    |
| NFKBIA-R          | GTCCTCTGTGAACTCCGTGA    |
| NFKBIE-F          | CATCTCACTCTCTGGACCTCC   |
| NFKBIE-R          | CCGAAGCAGCAATTCCATGA    |
| G3BP2-F           | AGAGGTGGTGGTGATGATCG    |
| G3BP2-R           | AGCCAAGTTTCTGTGCCATG    |
| GANAB-F           | GGATTGAGCGGGTGGTGATA    |
| GANAB-R           | TCTCAGGGTCATGCTGGAAG    |
| SETD7-F           | TGGGGAGATGACTGGAGAGA    |
| SETD7-R           | CCTCCCTTCTTCAGTGGACA    |
| BICD2-F           | GCTAAAGAAGGTGAGCGACG    |
| BICD2-R           | TAGTCCAGCATGACACGGTT    |
| has-miR-587       | TTCCATAGGTGATGAGTCAC    |
| has-miR-658       | AGGGAAGTAGGTCCGTTGGT    |
| has-miR-1270      | CTGGAGATATGGAAGAGCTGTG  |
| has-miR-1178-3p   | TTGCTCACTGTTCTTCCCTAG   |
| has-miR-1304-5p   | TTTGAGGCTACAGTGAGATGTG  |
| has-miR-510-5p    | TACTCAGGAGAGTGGCAATCAC  |
| has-miR-147b      | GTGCGGAAATGCTTCTGCTA    |
| has-miR-1298-5p   | TCATTCGGCTGTCCAGATGTA   |
| has-miR-644a      | AGTGTGGCTTTCTTAGAGC     |
| has-miR-1281      | ATATCGCCTCCTCCTCTCCC    |
| has-miR-578       | CTTCTTGTGCTCTAGGATTGT   |
| has-miR-625-5p    | AGGGGGAAAGTTCTATAGTCC   |
| has-miR-941       | CGGCTGTGTGCACATGTGC     |
| has-miR-1322      | GATGATGCTGCTGATGCTG     |
| has-miR-568       | ATGTATAAATGTATACACAC    |
| U6                | CTCGCTTCGGCAGCACA       |

|                                          |                                 |
|------------------------------------------|---------------------------------|
| miR reverse                              | Sangon Biotech,China            |
| <b>siRNAs</b>                            |                                 |
| si-NC sense                              | UUCUCCGAACGUGUCACGUTT           |
| si-NC antisense                          | ACGUGACACGUUCGGAGAATT           |
| si-circFNDC3B-1 sense                    | CAGACUUGCAAGGUGAUUGTT           |
| si-circFNDC3B-1 antisense                | CAAUCACCUUGCAAGUCUGTT           |
| si-circFNDC3B-2 sense                    | CUUGCAAGGUGAUUGAAGATT           |
| si-circFNDC3B-2 antisense                | UCUUCAAUACACCUUGCAAGTT          |
| si-G3BP2-1 sense                         | GGAGGAGAAGAACUUAGAATT           |
| si-G3BP2-1 antisense                     | UUCUAAGUUCUUCUCCUCCTT           |
| <b>miR-1178-3p mimics and inhibitors</b> |                                 |
| mimics NC sense                          | UUCUCCGAACGUGUCACGUTT           |
| mimics NC antisense                      | ACGUGACACGUUCGGAGAATT           |
| miR-1178-3p mimics sense                 | UUGCUCACUGUUCUCCCUAG            |
| miR-1178-3p<br>antisense                 | mimics<br>AGGGAAGAACAGUGAGCAAUU |
| inhibitor NC                             | CAGUACUUUUGUGUAGUACAA           |
| miR-1178-3p inhibitor                    | CUAGGGAAGAACAGUGAGCAA           |
| <b>FISH Probes</b>                       |                                 |
| Cy3-circFNDC3                            | ACTATCTTCAATCACCTTGCAAGTCTGAAT  |
| Cy3-U6                                   | TTTGC GTGTCATCCTTGCG            |
| Cy3-18S                                  | CTTCCTTGGATGTGGTAGCCGTTTC       |
| Cy5-hsa-miR-1178-3p                      | CTAGGGAAGAACAGTGAGCAA           |
| <b>Biotinylated probes</b>               |                                 |
| Biotin-circFNDC3B                        | ACTATCTTCAATCACCTTGCAAGTCTGAAT  |
| Biotin-miR-1178-3p                       | UUGCUCACUGUUCUCCCUAG            |
| Biotin-miR-1178-3p mutant                | AACGAGUGUGUUCUCCCUAG            |
