# Supplementary material for: Invasion-related circular RNA circFNDC3B inhibits bladder cancer progression through the miR-1178-3p/G3BP2/SRC/FAK axis
Source: Springer Nature journal article supplement (doi:10.1186/s12943-018-0908-8), 2018-11-20

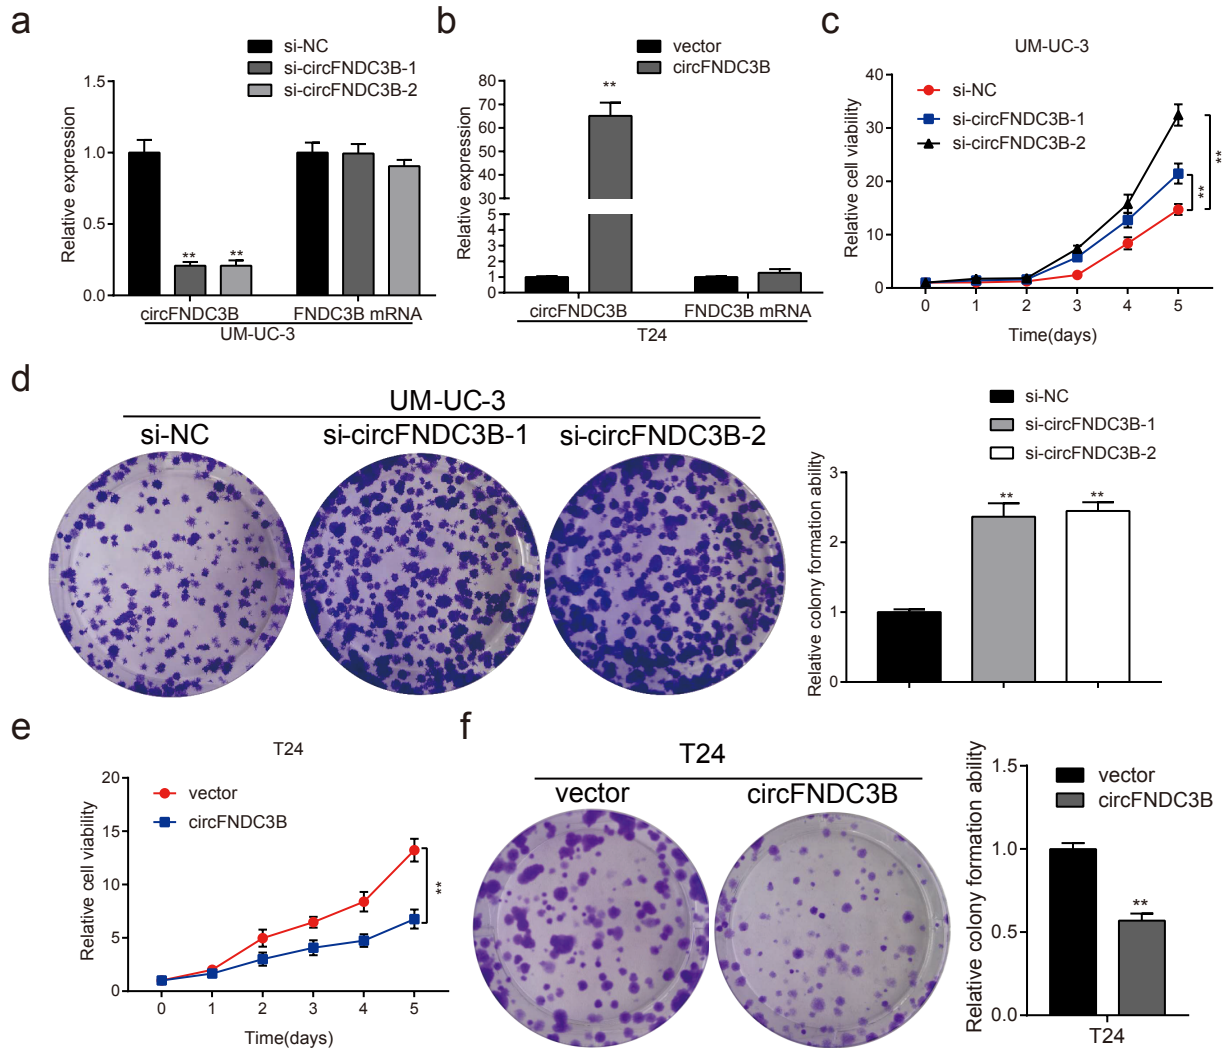

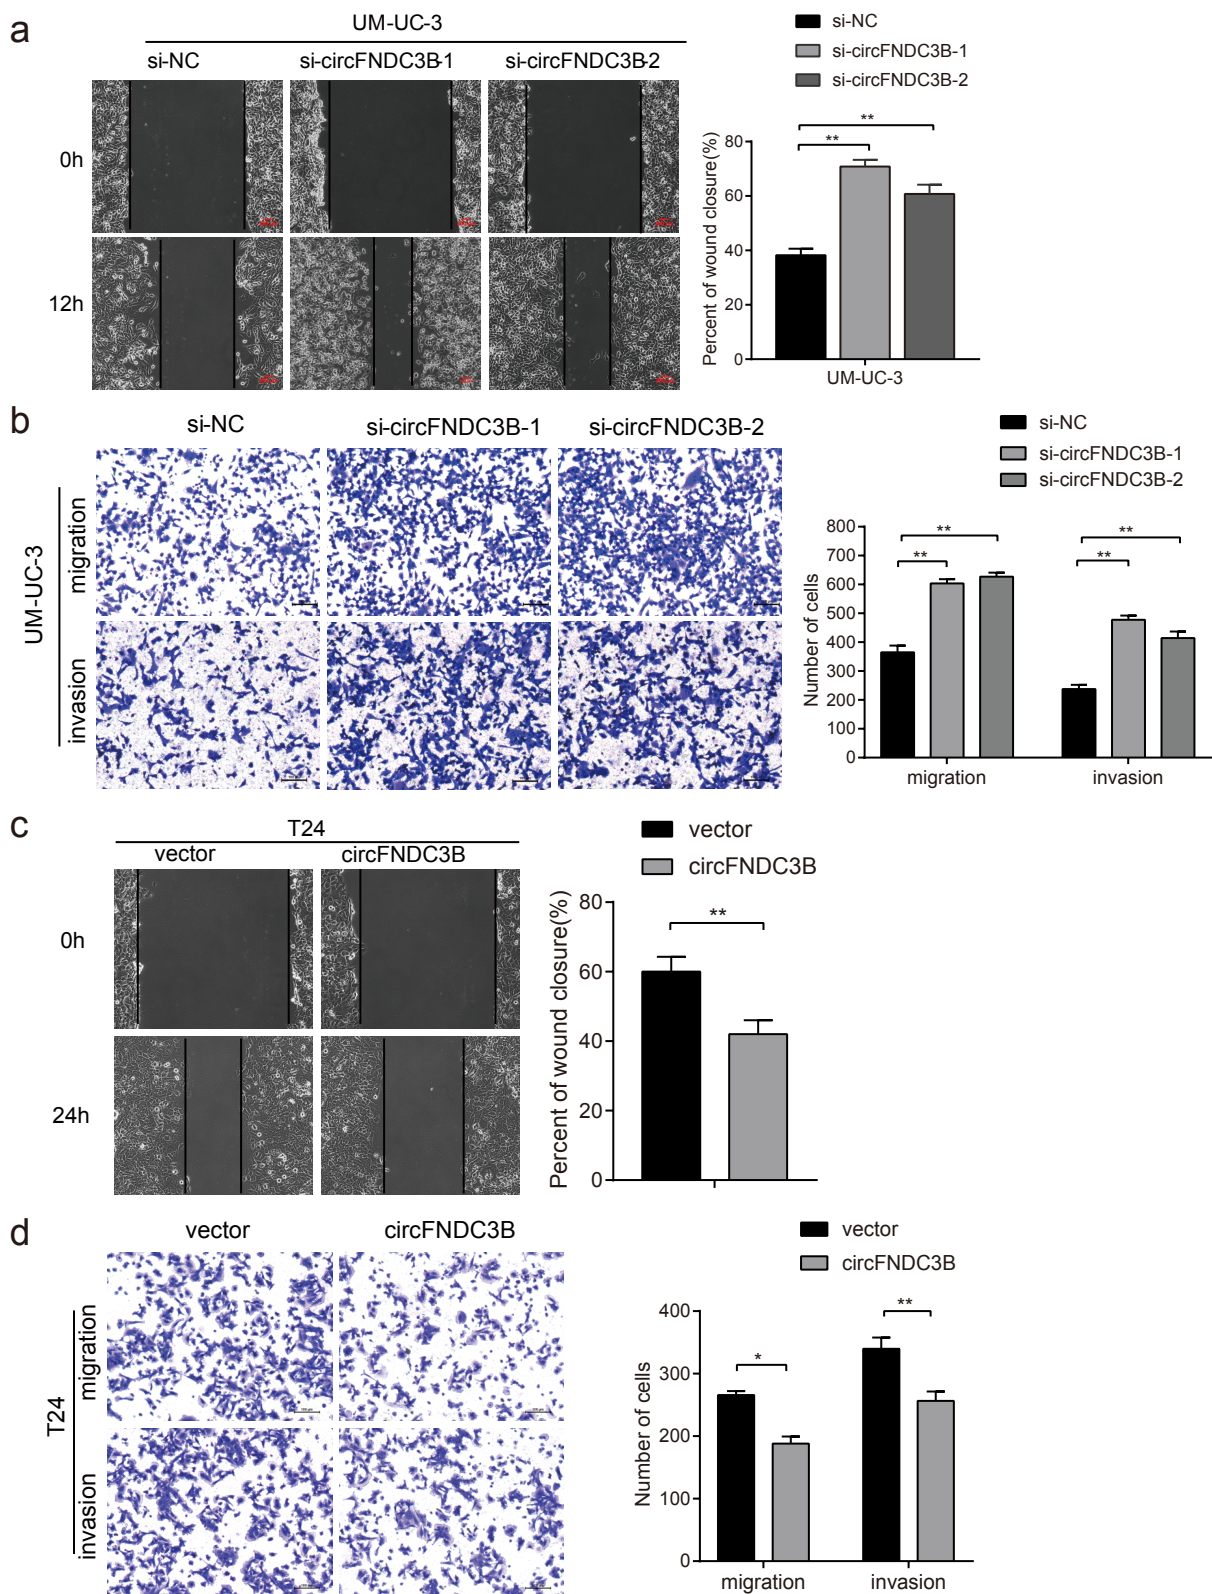

a

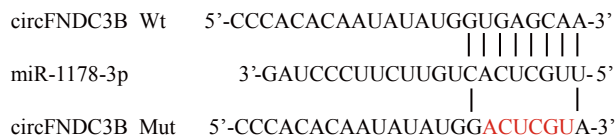

b

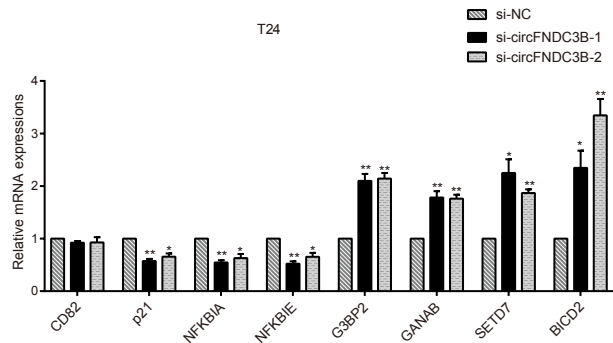

c

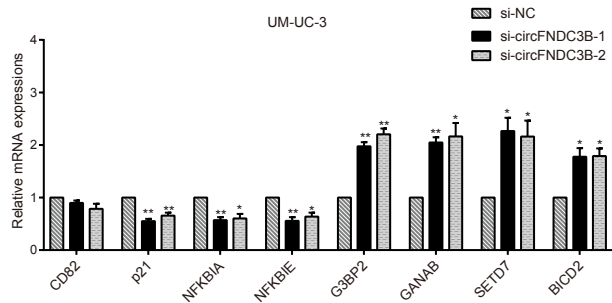

d

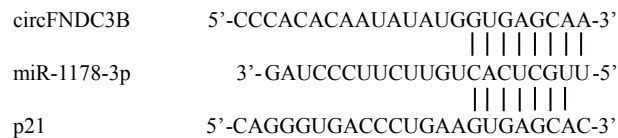

|                                   | Predicted consequential pairing of target region (top) and miRNA (bottom) | Site type |
|-----------------------------------|---------------------------------------------------------------------------|-----------|
| Position 558-564 of CDKN1A 3' UTR | 5' ... CAGGGUGACCCUGAAGUGAGCAC ...                                        | 7mer-m8   |
| hsa-miR-1178-3p                   | 3' GAUCCCUUCUUGUCACUCGUU                                                  |           |

e

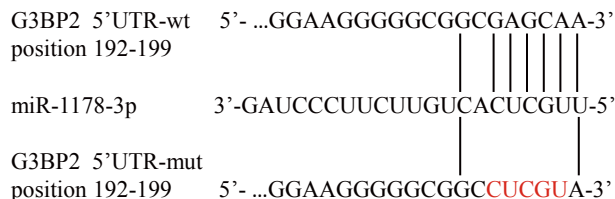

Supplement: MOESM2 [file 16284040]
